# Supplementary material for: miR-21 expression and clinical outcome in locally advanced pancreatic cancer: exploratory analysis of the pancreatic cancer Erbitux, radiotherapy and UFT (PERU) trial
Source: PubMed Central journal article supplement (PMC4914313; doi:10.18632/oncotarget.7208), 2016-02-05
Supplement: oncotarget-07-12672-s001.pdf [file oncotarget-07-12672-s001.pdf]

**miR-21 expression and clinical outcome in locally advanced pancreatic cancer: exploratory analysis of the pancreatic cancer Erbitux, radiotherapy and UFT (PERU) trial**

**Supplementary Material**

**Supplementary table 1. Radiotherapy administration details of all randomised patients. \*Due to inability of patient to reach the Hospital**

|                                                    | <b>RT + FLUO<br/>(n=7)</b> | <b>RT + FLUO + CETUX<br/>(n=6)</b> | <b>ALL</b>   |
|----------------------------------------------------|----------------------------|------------------------------------|--------------|
|                                                    | <b>N (%)</b>               | <b>N (%)</b>                       | <b>N (%)</b> |
| <b>Number of fractions/<br/>Gy of RT delivered</b> |                            |                                    |              |
| <b>0/0</b>                                         | 1 (14.2)                   | 0                                  | 1 (7.7)      |
| <b>28/50.4</b>                                     | 1 (14.2)                   | 1 (16.7)                           | 2 (15.4)     |
| <b>30/54</b>                                       | 5 (71.4)                   | 5 (83.3)                           | 10 (76.9)    |
| <b>Any delay in RT</b>                             |                            |                                    |              |
| <b>Yes</b>                                         | 2 (33.3)                   | 0                                  | 2 (16.7)     |
| <b>If delay Reasons</b>                            |                            |                                    |              |
| <b>Toxicity</b>                                    | 1 (16.7)                   | -                                  | 1 (8.3)      |
| <b>Other*</b>                                      | 1 (16.7)                   | -                                  | 1 (8.3)      |
| <b>Any gaps in RT</b>                              |                            |                                    |              |
| <b>Yes</b>                                         | 1 (16.7)                   | 0                                  | 1 (8.3)      |
| <b>GTV (cc)</b>                                    |                            |                                    |              |
| <b>Mean</b>                                        | 74.6                       | 45.8                               | 60.2         |
| <b>Min - Max</b>                                   | 22.1 – 241.1               | 26.3 – 62.8                        | 22.1 – 241.1 |
| <b>PTV (cc)</b>                                    |                            |                                    |              |
| <b>Mean</b>                                        | 398                        | 300                                | 349          |
| <b>Min - Max</b>                                   | 204 – 875                  | 231 - 394                          | 204 - 875    |
| <b>Boost (cc)</b>                                  |                            |                                    |              |
| <b>Mean (sd)</b>                                   | 220                        | 110                                | 166          |
| <b>Min - Max</b>                                   | 110 - 407                  | 0 - 171                            | 0 - 407      |

**Supplementary table 2: All serious adverse reactions (SAEs) reported on the study.**

Others included grade III ALT rise, grade III AST rise and biliary stent blockade

| TOXICITY                         | PHASE        |                   |                |                   |                |
|----------------------------------|--------------|-------------------|----------------|-------------------|----------------|
|                                  | Neo-adjuvant | Chemoradiotherapy |                | Adjuvant          |                |
|                                  |              | Without Cetuximab | With Cetuximab | Without Cetuximab | With Cetuximab |
| <b>Abdominal pain</b>            | 1            | 0                 | 0              | 0                 | 1              |
| <b>Allergic reaction</b>         | 1            | 0                 | 0              | 0                 | 0              |
| <b>Diarrhoea</b>                 | 2            | 0                 | 1              | 0                 | 0              |
| <b>Febrile Neutropenia</b>       | 0            | 0                 | 0              | 0                 | 2              |
| <b>Nausea</b>                    | 1            | 1                 | 0              | 0                 | 0              |
| <b>Neutropenia</b>               | 0            | 0                 | 0              | 0                 | 1              |
| <b>Non Neutropenic infection</b> | 6            | 0                 | 0              | 0                 | 0              |
| <b>Pneumonitis</b>               | 1            | 0                 | 0              | 0                 | 0              |
| <b>Vomiting</b>                  | 2            | 1                 | 0              | 0                 | 0              |
| <b>Other</b>                     | 3            | 0                 | 0              | 0                 | 0              |

**Supplementary table 3. miR-21 expression analysis and Disease Control Rate (DCR) in all randomised patients.** (Response data were missing for one patient).

|                    | <b>Number of events</b> | <b>Number of subjects</b> | <b>DCR after NACT (%)</b> | <b>p-value (exact test)</b> |
|--------------------|-------------------------|---------------------------|---------------------------|-----------------------------|
| <b>Low miR-21</b>  | 6                       | 6                         | 100                       | 0.061                       |
| <b>High miR-21</b> | 2                       | 5                         | 40.0                      |                             |
